# Supplementary material for: One-pot synthesis of magnesium nanoparticles embedded in a chitosan microparticle matrix: a highly biocompatible tool for in vivo cancer treatment
Source: Royal Society of Chemistry journal article supplement (doi:10.1039/c5tb02499d), 2015-12-09
Supplement: c5tb02499d1.pdf [file c5tb02499d1.pdf]

## Supporting information

### **One-pot synthesis of magnesium nanoparticles embedded in chitosan microparticles: a highly biocompatible tool for in vivo cancer treatment**

R. C. Martin,<sup>a</sup> Erica Locatelli,<sup>b</sup> Y. Li,<sup>a</sup> Paolo Matteini,<sup>c</sup> Ilaria Monaco,<sup>b</sup> G. Cui,<sup>a</sup> S. Li,<sup>a</sup> Martina Banchelli,<sup>c</sup> Roberto Pini<sup>c</sup> and Mauro Comes Franchini<sup>b\*</sup>

*a. Division of Surgical Oncology, Department of Surgery, University of Louisville. Louisville, KY 40202 USA.*

*b. Department of Industrial Chemistry "TosoMontanari", University of Bologna. Via Risorgimento, 40136, Bologna Italy.*

*c. Institute of Applied Physics "NelloCarrara", National Research Council of Italy, via Madonna del Piano 10, I-50019 Sesto Fiorentino, Italy*

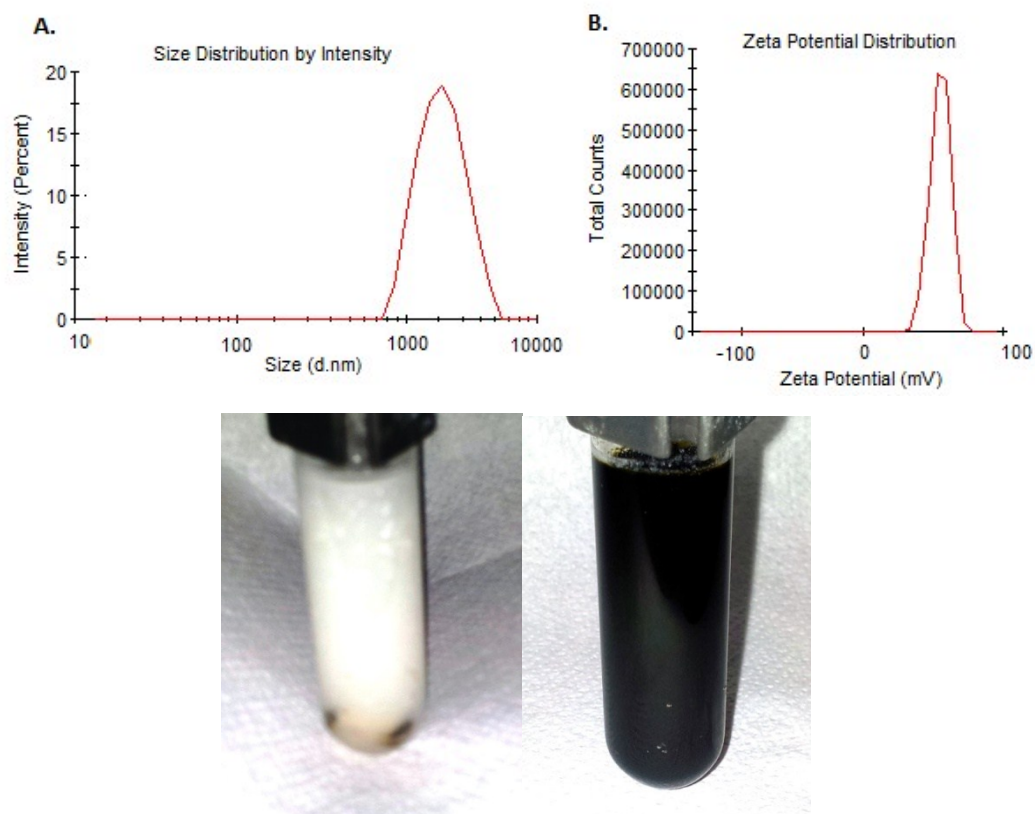

**Figure S1:** Upper: DLS analysis of Chit-Mg MPs: size (A) and Z-potential (B) distribution. Bottom: pictures of schlenck taken before (left site) and after (right site) the beginning of the formation of MgNPs.

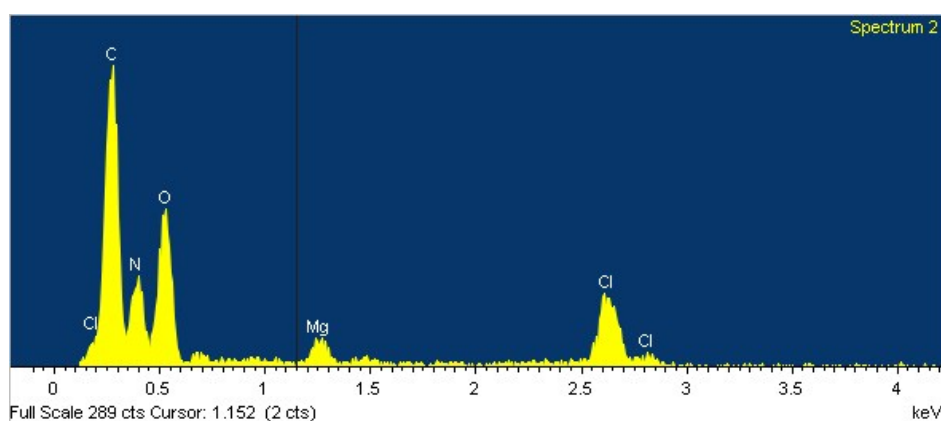

**Figure S2:** EDX analysis of Chit-Mg MPs

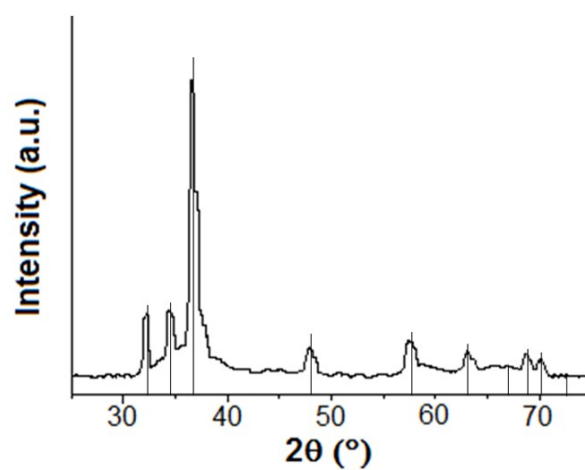

**Figure S3:** XRD analysis of Mg@Chit MPs

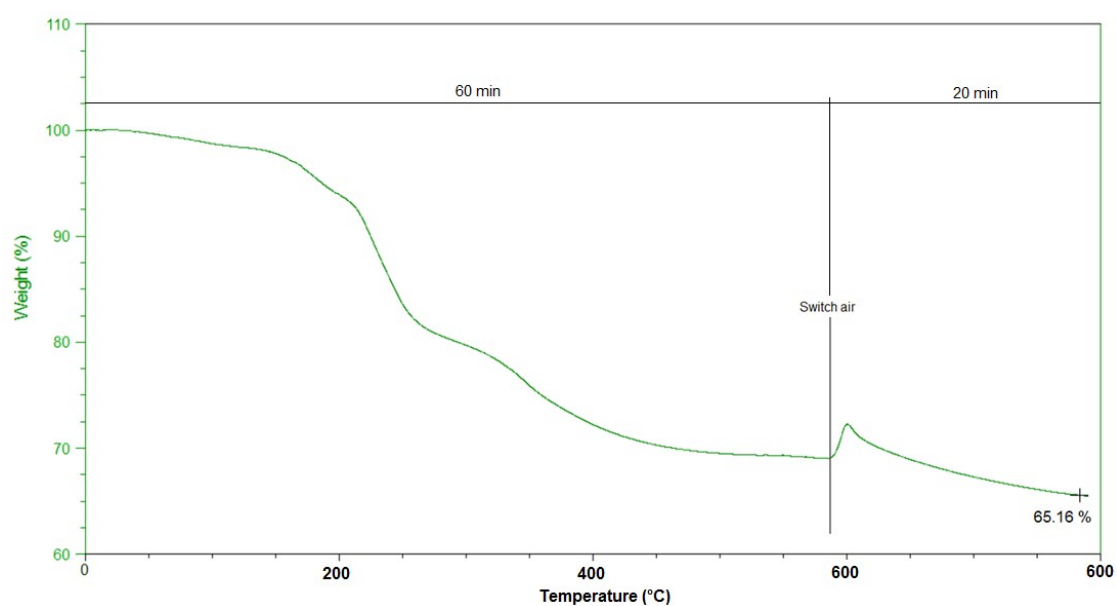

**Figure S4:** TGA of Mg@Chit MPs (from r.t. to 600 °C in 60 min in nitrogen flow, then isotherm at 600 °C for 10 minutes in air)

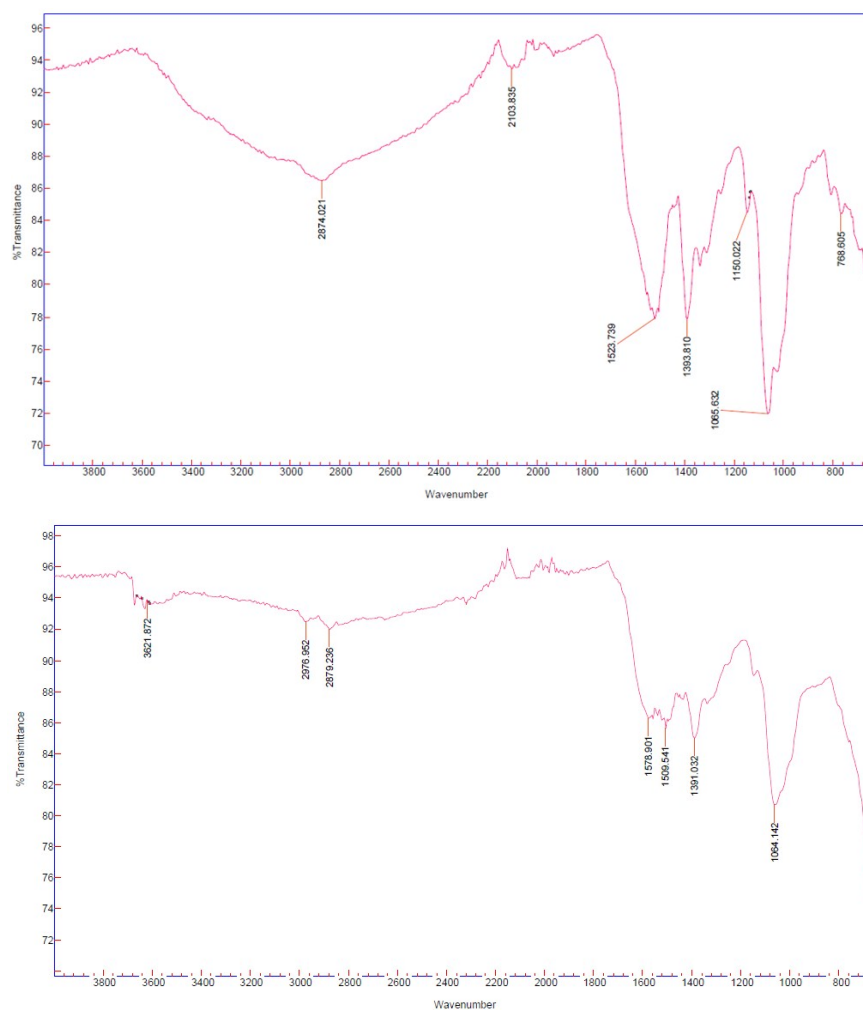

**Figure S5:** FTIR of Chitosan(top) and Mg@Chit MPs (bottom).

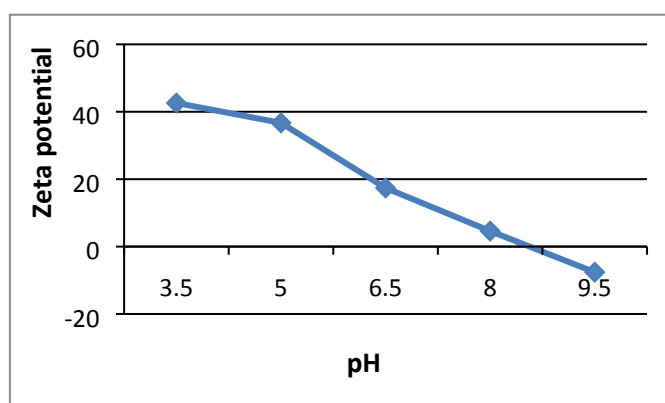

**Figure S6:** Zeta potential of Mg@Chit MPs at different pH of the solution

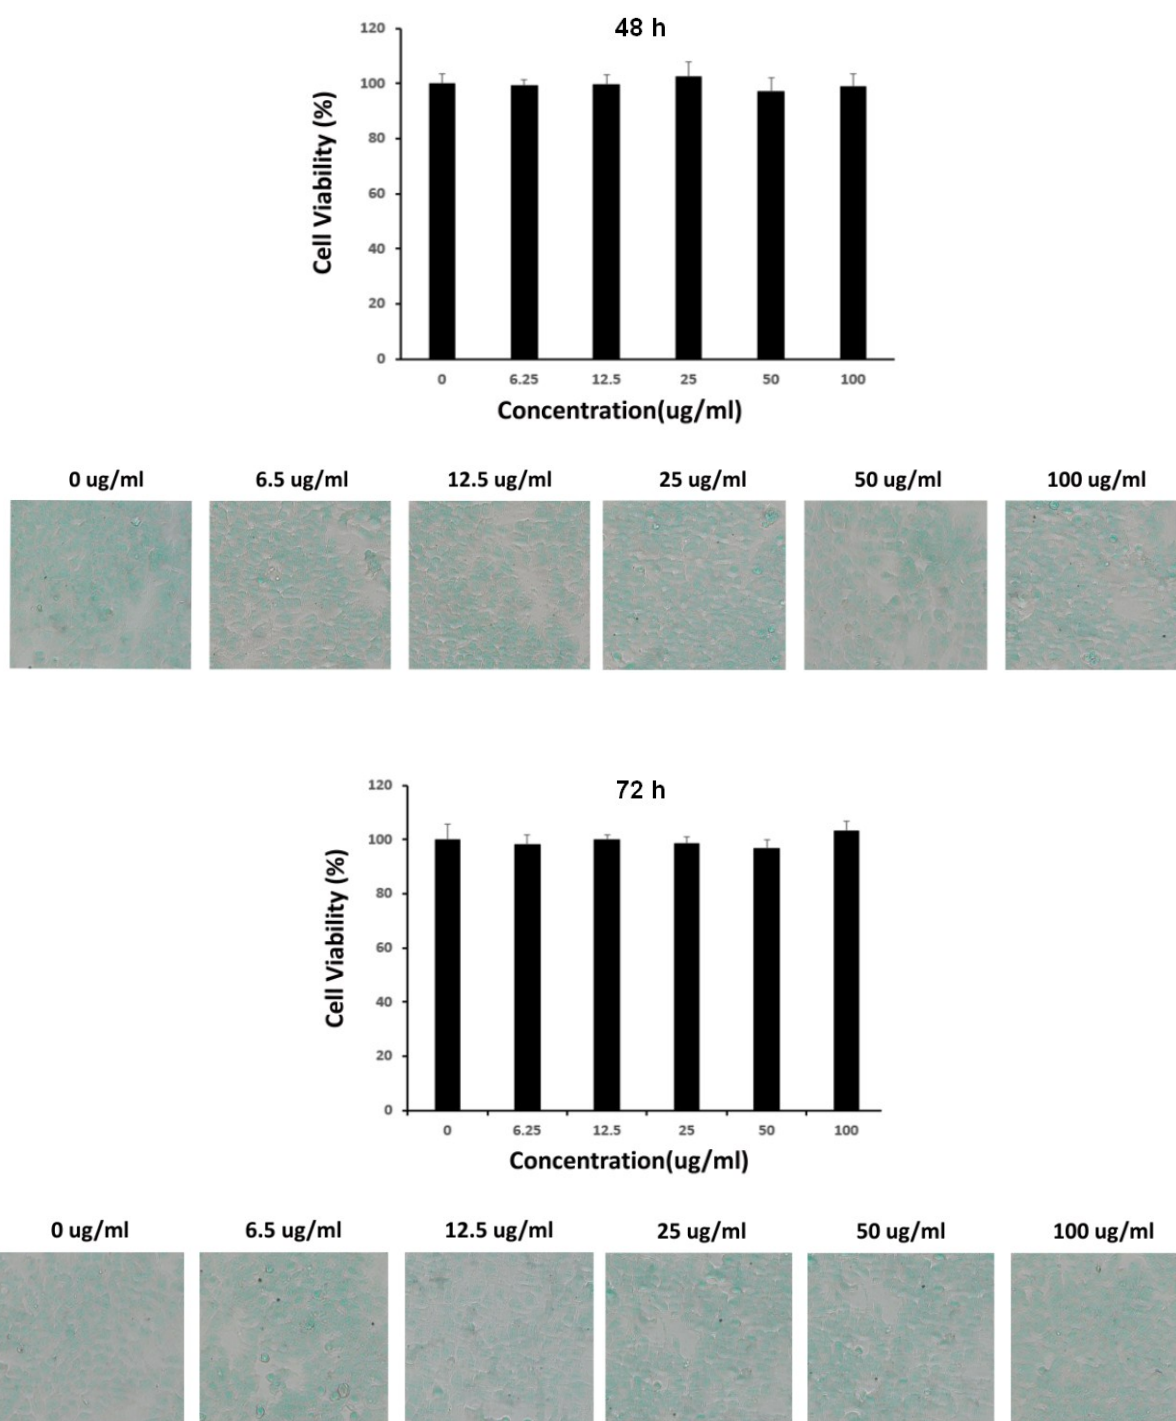

**Figure S7:** MTT test on hepa1-6 cell lines exposed to Mg@Chit MPs at different concentration for 48 and 72 hours respectively. Representative pictures of cells after exposure at each concentration and time point are also reported.

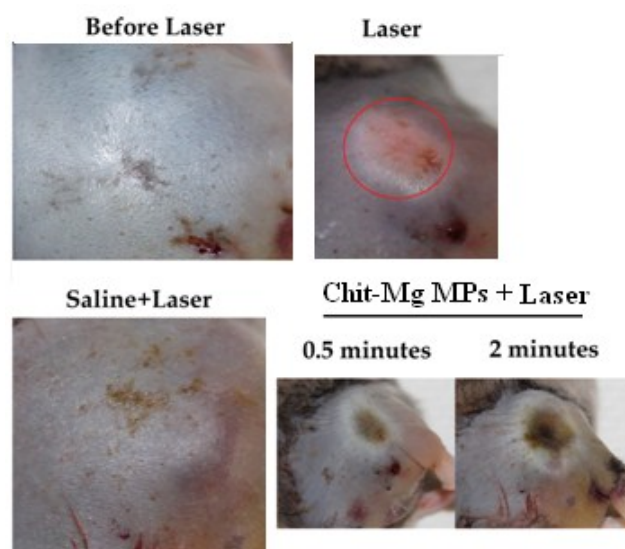

**Figure S8.** Gross observation of tumor with Chit-Mg MPs and laser exposure. Top left: the subcutaneous tumor before laser exposure. Top right: laser exposure was ongoing, the spot of laser exposure showed on tumor site. Bottom left: saline administration after laser exposure. Bottom right: Chit-Mg MPs administration 0.5 minute and 2 minutes after laser exposure.
